1 **Genetic Architecture of Chilling Tolerance in Sorghum Dissected with a Nested Association**  
2 **Mapping Population**

3  
4 Sandeep R. Marla,<sup>\*</sup> Gloria Burow,<sup>†</sup> Ratan Chopra,<sup>†,1</sup> Chad Hayes,<sup>†</sup> Marcus O. Olatoye,<sup>\*,2</sup> Terry  
5 Felderhoff,<sup>\*</sup> Zhenbin Hu,<sup>\*</sup> Rubi Raymundo,<sup>\*</sup> Ramasamy Perumal,<sup>\*,‡</sup> and Geoffrey P. Morris<sup>\*,3</sup>

6  
7 <sup>\*</sup>Department of Agronomy, Kansas State University, Manhattan, KS, 66506; <sup>†</sup>USDA-ARS, Plant  
8 Stress & Germplasm Development Unit, Cropping Systems Research Lab, Lubbock, TX, 79415;  
9 <sup>‡</sup>Agricultural Research Center, Kansas State University, Hays, Kansas 67601.

10

11 Present address: <sup>1</sup>Department of Agronomy and Plant Genetics, University of Minnesota, St.  
12 Paul, MN 55108; <sup>2</sup>Department of Crop Science, University of Illinois, Urbana-Champaign,  
13 61820.

14

15 **Short title:** Genetics of chilling tolerance

16 **Keywords:** Multiparental population; Crop evolution; Climate adaptation; Cold tolerance;  
17 Antagonistic pleiotropy; Linkage drag.

18 <sup>3</sup>**Corresponding author:**

19 Dr. Geoffrey P. Morris  
20 1712 Claflin Road  
21 3004 Throckmorton Plant Science Center  
22 Dept. of Agronomy  
23 Manhattan, KS, 66506  
24 gpmorris@ksu.edu; Tel: +1 785 532 3397

25

26 **Disclaimer**

27 Mention of a trademark, warranty, proprietary product, or vendor does not constitute a guarantee  
28 by the USDA and does not imply approval or recommendation of the product to the exclusion of  
29 others that may be suitable. USDA is an equal opportunity provider and employer.

30

31 **Abstract**

32 Dissecting the genetic architecture of stress tolerance in crops is critical to understand and  
33 improve adaptation. In temperate climates, early planting of chilling-tolerant varieties could  
34 provide longer growing seasons and drought escape, but chilling tolerance (<15°) is generally  
35 lacking in tropical-origin crops. Here we developed a nested association mapping (NAM)  
36 population to dissect the genetic architecture of early-season chilling tolerance in the tropical-  
37 origin cereal sorghum (*Sorghum bicolor* [L.] Moench). The NAM resource, developed from  
38 reference line BTx623 and three chilling-tolerant Chinese lines, is comprised of 771 recombinant  
39 inbred lines genotyped by sequencing at 43,320 single nucleotide polymorphisms. We  
40 phenotyped the NAM population for emergence, seedling vigor, and agronomic traits (>75,000  
41 data points from ~16,000 plots) in multi-environment field trials in Kansas under natural chilling  
42 stress (sown 30–45 days early) and normal growing conditions. Joint linkage mapping with  
43 early-planted field phenotypes revealed an oligogenic architecture, with 5–10 chilling tolerance  
44 loci explaining 20–41% of variation. Surprisingly, several of the major chilling tolerance loci co-  
45 localize precisely with the classical grain tannin (*Tan1* and *Tan2*) and dwarfing genes (*Dw1* and  
46 *Dw3*) that were under strong directional selection in the US during the 20th century. These  
47 findings suggest that chilling sensitivity was inadvertently selected due to coinheritance with  
48 desired nontannin and dwarfing alleles. The characterization of genetic architecture with NAM  
49 reveals why past chilling tolerance breeding was stymied and provides a path for genomics-  
50 enabled breeding of chilling tolerance.

51

52 **Article Summary**

53 Chilling sensitivity limits productivity of tropical-origin crops in temperate climates, and remains  
54 poorly understood at a genetic level. We developed a nested association mapping resource in  
55 sorghum, a tropical-origin cereal, to understand the genetic architecture of chilling tolerance.  
56 Linkage mapping of growth traits from early-planted field trials revealed several major chilling  
57 tolerance loci, including some colocalized with genes that were selected in the origin of US grain  
58 sorghum. These findings suggest chilling sensitivity was inadvertently selected during 20th  
59 century breeding, but can be bypassed using a better understanding of the underlying genetic  
60 architecture.

61

## 62 Introduction

63 Adaptation to diverse environments has generated abundant genetic diversity in wild and  
64 domesticated plant species (Anderson *et al.* 2011; Meyer and Purugganan 2013). The genetic  
65 architecture of adaptation has been intensively studied both theoretically and empirically, but  
66 remains contentious. For instance, much debate surrounds the relative contributions of standing  
67 genetic variation versus new mutation (Barrett and Schluter 2008), oligogenic versus polygenic  
68 variation (Orr 2005), and pleiotropic versus independent effects (Paaby and Rockman 2013).  
69 Despite the importance of adaptive variation in crop improvement, the genomic basis of local  
70 adaptation underlying abiotic stressors remains poorly understood (Olsen and Wendel 2013).  
71 Understanding the genomic basis of adaptation in crops can guide breeding strategies and  
72 facilitate transfer of adaptive traits for new climate-resilient varieties (Soyk *et al.* 2017; Zhu *et al.*  
73 *et al.* 2018; Li *et al.* 2018).

74 Cold temperatures are a major factor limiting plant productivity globally for both wild  
75 plants and crops (Cramer *et al.* 1999). Tropical-origin crops (e.g. maize, rice, tomato, cotton,  
76 sorghum) are typically sensitive to chilling temperatures (0–15°), which limits their range and/or  
77 growing season in temperate climates (Lyons 1973; Long and Spence 2013). Developing  
78 chilling-tolerant varieties could facilitate early planting to extend growing seasons, prevent soil  
79 moisture depletion, and shift growth and flowering to more favorable evapotranspirative  
80 conditions (Tuberosa 2012; Ma *et al.* 2015). For breeding chilling tolerance in tropical-origin  
81 crops, chilling-adapted germplasm from high-latitude zones and high-altitude tropical regions  
82 can be targeted as donors. Molecular mechanisms underlying cold tolerance (chilling and/or  
83 freezing temperatures) include C-repeat binding factor (CBF) regulon cold signaling  
84 (Thomashow 2001; Park *et al.* 2015; Wang *et al.* 2018), jasmonate signaling (Hu *et al.* 2013;  
85 Mao *et al.* 2019), and lipid remodelling (Li *et al.* 2004; Moellering *et al.* 2010).

86 Sorghum, a tropical-origin warm-season (C4) cereal, is among the major crops that are  
87 generally susceptible to chilling (Franks *et al.* 2006). Sorghum originated in tropical Africa (c.  
88 5–10 thousand years ago) and diffused to temperate areas, including China (c. 800 years ago)  
89 and the United States (c. 200 years ago) (Kimber 2000). Diffusion of tropical sorghums to  
90 temperate climates has led to commercial sorghum industries covering several million hectares in  
91 US, Australia, Argentina, and China (Monk *et al.* 2014). Using a phytogeographic approach  
92 (Vavilov 1951), Chinese sorghum were targeted as chilling tolerance donors for conventional  
93 breeding starting in the 1960s (Stickler *et al.* 1962). However, characteristics of Chinese  
94 sorghums that are undesirable for US grain sorghum, particularly grain tannins and tall stature  
95 (>2 m) (Franks *et al.* 2006), have hampered breeding. Biparental linkage mapping identified  
96 chilling tolerance QTL tagged by the same molecular markers as grain tannins and plant height,  
97 but small populations and low marker density limited dissection of these traits (Knoll *et al.* 2008;  
98 Brown *et al.* 2008; Xiang 2009; Burow *et al.* 2010; Wu *et al.* 2012). Several classical tannin  
99 (*Tan1* and *Tan2*) and dwarfing (*Dw1–Dw4*) genes (Stephens 1946; Quinby and Karper 1954)  
100 have been cloned in recent years (Multani *et al.* 2003; Wu *et al.* 2012; Hilley *et al.* 2016, 2017),  
101 which could aid further trait dissection.

102 NAM populations can provide increased power for dissecting complex traits (Buckler *et*  
103 *al.* 2009; Ogut *et al.* 2015), particularly for adaptive traits where population structure confounds  
104 associations studies of natural populations (Bouchet *et al.* 2017). To dissect the genetic  
105 architecture of early-season chilling tolerance in sorghum, we developed and deployed a new  
106 nested association mapping (chilling NAM) resource. The chilling NAM population addresses a  
107 gap in existing sorghum NAM resources (Bouchet *et al.* 2017) by including contrasting  
108 temperate-adapted founders, three chilling-tolerant Chinese founders and the chilling-susceptible  
109 reference line BTx623 (Paterson *et al.* 2009). We used the chilling NAM to dissect the genetic  
110 architecture of sorghum early-season chilling tolerance at a high resolution based on natural field  
111 stress conditions. This NAM study provides insights into the origin and persistence of chilling  
112 sensitivity in US grain sorghum, and reveals new strategies for genomics-enabled breeding in  
113 this system.

## 114 **Materials and Methods**

### 115 ***Population development***

116 The chilling NAM population consists of three biparental populations that share a common  
117 parent, the US reference line BTx623 (Paterson *et al.* 2009) (Figure S1). The NAM founders  
118 were selected based on their contrasting chilling responses from early planting in preliminary  
119 studies in Lubbock, Texas. Chilling-sensitive BTx623 was used as the seed parent in crosses  
120 with three chilling-tolerant Chinese founders, Niu Sheng Zui (NSZ; PI 568016), Hong Ke Zi  
121 (HKZ; PI 567946), and Kaoliang (Kao; PI 562744) in Lubbock, Texas. BTx623 is derived from  
122 Combine Kafir × SC170, an Ethiopian zerazera caudatum (Menz *et al.* 2004). The resulting F<sub>1</sub>  
123 progenies were self-pollinated to generate three segregating F<sub>2</sub> populations. RILs were developed  
124 using single-seed descent by selfing to the F<sub>6</sub> generation in Lubbock, Texas (summer nursery)  
125 and Guayanilla, Puerto Rico (winter nursery). The F<sub>6,7</sub> RILs were derived by combining seeds of  
126 3–4 uniform panicles. Additional seed increase of the NAM population was conducted in Puerto  
127 Vallarta, Mexico (winter nursery), by selfing the F<sub>6,7</sub> plants to derive F<sub>6,8</sub> RILs. Below, the  
128 Chinese founder name will be used when referring to a given RIL family (e.g., the NSZ family).

### 129 ***Early- and normal-planted field trials***

130 Six early- and two normal-planted field trials were conducted in 2016, 2017, and 2018 in Kansas  
131 (Table S1). Three locations, two in eastern Kansas [Ashland Bottoms (AB), 39.14N -96.63W;  
132 Manhattan (MN), 39.21N -96.60W] and one in western Kansas [Agricultural Research Center,  
133 Hays (HA), 38.86N -99.33W], were used for field trials (Figure 1A). Abbreviated location name  
134 and the last two digits of the year (e.g. AB16 for Ashland Bottoms 2016) were assigned for each  
135 field trial. A suffix was added to the AB16 field trials, AB16\_b1 and AB16\_b2, as both were  
136 planted in AB with an interval of two weeks between plantings. The F<sub>6,7</sub> RILs were planted in  
137 AB16, while F<sub>6,8</sub> RILs were planted in AB, MN, and HA in 2017 and 2018. Each field trial  
138 contained two replicates of the NAM population. The NAM RILs were randomized within  
139 family in 2016, and completely randomized in 2017 and 2018 in each replicate block (Figures  
140 1A and S2). Controls in each field trial comprised chilling-tolerant Chinese accessions NSZ,

141 HKZ, Kao, and Shan Qui Red (SQR; PI 656025), chilling-sensitive inbreds BTx623 and  
142 RTx430, and US commercial grain sorghum hybrid Pioneer 84G62.

143 Five early-planted (EP, natural chilling stress) trials were sown in April and one in early  
144 May (MN17), 30–45 days earlier than normal sorghum planting in Kansas (Grain Sorghum  
145 Production Handbook, 1998). The EP trials, except MN17, experienced chilling stress ( $<15^{\circ}$ )  
146 during emergence (Table S1 and Figure S3). Optimal temperatures ( $>15^{\circ}$ ) prevailed in MN17  
147 during emergence, but one-week-old seedlings experienced chilling stress ( $5\text{--}13^{\circ}$ ). Normal-  
148 planted (NP, optimal temperature) field trial was sown in June when the soil temperatures were  
149 optimal for sorghum cultivation ( $>15^{\circ}$ ). AB18 was considered as the second NP trial, although  
150 planted in early May, as optimal conditions prevailed during emergence and seedling growth.

### 151 ***Field phenotyping***

152 Seedling phenotypes of the NAM population were evaluated under early- and normal-planted  
153 field trials. Prefixes EP and NP were included for each seedling trait to differentiate phenotypes  
154 from early- and normal-planted trials, respectively. Emergence count (EC) was scored on a scale  
155 of 1–5 that represented 20, 40, 60, 80, and 100% emergence, respectively. Three seedling vigor  
156 (SV) ratings (SV1–SV3) were collected at week-1, -2, and -4, respectively, after emergence. SV  
157 was scored on a rating scale of 1–5 with a rating of 1 and 5 for low and robust vigor, respectively  
158 (Figure 1B). A previously described SV scale (Maiti *et al.* 1981) was modified (1 for high and 5  
159 for low SV) for consistency with EC rating. Repeatability of SV rating, SV2 (AB17) and SV3  
160 (MN17), was tested with SV ratings collected simultaneously by different individuals. Early-  
161 planted damage rating (EPDR), based on visual damage observed two days after a severe chilling  
162 stress event, was scored on a 1–5 rating scale representing seedling death/severe leaf-tip burning,  
163 leaf-tip burning, severe chlorosis, mild/partial chlorosis, and no chilling damage symptoms,  
164 respectively. Seedling height was measured manually one month after initial emergence in each  
165 location.

166 Plant height and flowering time (days to flowering after emergence), the major  
167 agronomic traits, were collected from three (AB16\_b1, MN17, and MN18) and two (AB16\_b1  
168 and MN17) field trials, respectively. Agronomic suitability of the NAM population as US grain  
169 sorghum, which included semi-dwarf stature, panicle exertion, standability, and compact panicle  
170 architecture, was screened in AB16\_b1. Presence or absence of grain tannins in field-grown  
171 samples (from Puerto Vallarta, Mexico) of each RIL was determined using bleach test with SQR,  
172 a Chinese accession containing grain tannin, as a positive control (Wu *et al.* 2012). Fifteen seeds  
173 from each RIL were transferred into a 2 ml tube and 1 ml bleach solution (3.5% sodium  
174 hypochlorite and 5% sodium hydroxide) was added. RILs with tannins turned black after 30 min  
175 and were scored as 1. By contrast, nontannin RIL seed did not change their color and were  
176 scored as 0.

### 177 ***Statistical analysis of phenotypes***

178 Trait correlation between locations was determined using the averaged seedling trait ratings of  
179 two replicates from each field trial. Pearson pairwise correlation analysis was performed using  
180 *pairs.panels* function in psych R package. Broad sense heritability ( $H^2$ ) estimate of EP and NP

181 field phenotypes was calculated with seedling ratings from six EP and two NP field trials,  
182 respectively. Seedling traits  $H^2$  was calculated from variance components generated with the  
183 *lme4* (Bates *et al.* 2015) R package as described earlier (Boyles *et al.* 2017). All components  
184 were treated as random effects and replicates were nested in location-by-year interaction:

$$lmer(\text{Trait} = (1|G) + (1|L) + (1|Y) + (1|R\%in\%L:Y) + (1|G:L) + (1|G:Y)$$

185  
186 and broad-sense heritability was calculated using the equation:

$$H^2 = \frac{\sigma^2 G}{\sigma^2 G + \left(\frac{\sigma^2 G_{G \times L}}{L}\right) + \left(\frac{\sigma^2 G_{G \times Y}}{Y}\right) + \left(\frac{\sigma^2 E}{LY}\right)}$$

187 where  $G$  is the genotype,  $L$  is the location,  $Y$  is the year,  $R$  is the replicate, and  $E$  is the error term.  
188 Environment main effects were not included in the denominator as they do not influence  
189 response to selection (Holland *et al.* 2003). Best linear unbiased predictions (BLUPs) of EP and  
190 NP seedling traits were generated using the model for estimating  $H^2$ .

### 191 **DNA extraction and genotyping**

192 Genotyping-by-sequencing (GBS) was conducted on one-week-old seedlings of the F<sub>6:7</sub> RILs  
193 and the four NAM founders (Figure S1). Leaf tissue (~50 mg, pooled from three seedlings) from  
194 each RIL was transferred into a 96-deepwell plate, lyophilized, and stored at -80°. One ball  
195 bearing was added to each well and the leaf tissue was ground with a Retsch Mixer Mill MM400  
196 tissue grinder (Vernon Hills, IL, USA). Genomic DNA was extracted using QIAGEN BioSprint  
197 96 DNA plant kit (Germantown, MD, USA). DNA was quantified with Quant-iT PicoGreen  
198 dsDNA assay kit (Thermo Fisher Scientific, Grand Island, NY, USA) using Agilent 2100  
199 Bioanalyzer (Santa Clara, CA, USA) at the Kansas State University Integrated Genomics  
200 Facility. Each sample was normalized to contain 10 ng/μl DNA using QIAgility Liquid Handling  
201 System (Germantown, MD, USA). Six μl of DNA was transferred to a 96-well PCR plate and  
202 adapters were added. *ApeKI* enzyme was used for restriction digestion and GBS libraries were  
203 prepared as described previously (Elshire *et al.* 2011; Morris *et al.* 2013a). Illumina HiSeq 2500  
204 Rapid v2 sequencing system was used for 100-cycle single-end sequencing of two 384-  
205 multiplexed libraries at the University of Kansas Medical Center Genome Sequencing Facility.

206 GBS data from the chilling NAM resource was combined with previously published  
207 *ApeKI* GBS data from ~10,323 diverse accessions (Hu *et al.* 2019), aligned to the BTx623  
208 reference genome v3.1 (McCormick *et al.* 2018), and SNP calling was performed using Tassel  
209 5.0 GBS v2 pipeline (Glaubitz *et al.* 2014). GBS of the chilling NAM population provided  
210 528,065 single nucleotide polymorphisms (SNPs) (Figure S1). After filtering the GBS data for  
211 80 percent missingness (PM) and 0.05 minor allele frequency (MAF) 61,428 SNPs were  
212 retained. These SNPs were separated by individual chromosomes and imputed using Beagle 4.1  
213 (Browning and Browning 2013). Additional filtering for markers and RILs with >15% residual  
214 heterozygosity retained 43,320 SNPs and 750 RILs for joint linkage mapping.

## 215 ***Population genetic analyses***

216 Genetic structure of the chilling NAM population was characterized with respect to global  
217 sorghum germplasm. First, the chilling NAM and global accessions GBS data was filtered for 80  
218 PM and 0.01 MAF, and the retained SNPs (265K) were imputed using Beagle 4.1 (Browning and  
219 Browning 2013). Next, two PCA axes were built with previously published *ApeKI* GBS data of  
220 401 global sorghum accessions (Morris *et al.* 2013a), and chilling NAM founders and RILs were  
221 projected on these axes. Principal component analysis (PCA) of global germplasm was  
222 performed using *prcomp* function in R. Coordinates for the chilling NAM population were  
223 calculated with the *predict* function in R.

224 Neighbor-joining analysis, using TASSEL 5.0, was conducted with 61,428 SNPs to  
225 characterize the genetic relatedness of the chilling NAM population. Phylogenetic tree was  
226 constructed with Ape package (Paradis *et al.* 2004) in R (R Core Team, 2014). SNP density was  
227 calculated with VCFtools in 200kb windows. Linkage disequilibrium (LD) decay was estimated,  
228 using pairwise comparisons of ~55–70K GBS SNPs, individually for the three NAM families  
229 with PopLDdecay v.3.29 package (Zhang *et al.* 2018). LD decay of 176 Ethiopian and 29  
230 Chinese landraces (genotyped previously with *ApeKI*) (Lasky *et al.* 2015) was estimated for  
231 comparison. Ethiopian and Chinese germplasm LD decay was calculated using ~100K and ~57K  
232 SNPs, respectively. Parameters were set for -MaxDist as 500 kb and -MAF as 0.05. LD decay  
233 curves were plotted based on  $r^2$  and the distance between pairs of SNPs.

## 234 ***Linkage mapping analysis***

235 The NAM founders genotypes were used for constructing genetic linkage maps with the R/qtl  
236 package (Broman *et al.* 2003). The NAM founders were filtered for 20 PM and <0.4 MAF and  
237 the retained SNPs were used to retrieve the NAM population genotypes from the GBS dataset.  
238 SNP imputation was conducted for each family separately using Beagle 4.1 (Browning and  
239 Browning 2016). RILs with >85% missing data or >80 crossovers were dropped. Duplicate  
240 markers (i.e. mapping to the same location) were dropped. Genetic linkage maps for each NAM  
241 family were generated using the *Haldane* function. The *Droponemarker* function in R/qtl was  
242 used to discard problematic markers that increase chromosome length. Genetic linkage maps  
243 were reconstructed for each NAM family. Composite interval mapping (CIM) (Zeng 1994), with  
244 R/qtl, was used for performing linkage mapping and significant QTL were determined based on  
245 the threshold level defined by computing 1000 permutations. Allelic effects were defined as  
246 positive or negative effects of the BTx623 allele. LOD support interval for individual QTL was  
247 obtained with the *lodint* R/qtl function. CIM was performed with plant height, flowering time,  
248 and grain tannin data to validate the generated genetic linkage maps. BLUPs of seedling traits,  
249 EC and SV1–3, from early- and normal-planted field trials were used for CIM. Additionally,  
250 linkage mapping was performed for individual field trials with the averaged data of two  
251 replicates from each location.

## 252 ***Joint linkage mapping***

253 Joint linkage mapping (JLM) was conducted with 43,320 GBS SNPs and seedling trait BLUPs  
254 from 750 RILs. In addition, JLM was performed individually for each location with the averaged



255 data of two replicates. Mapping power and resolution of the chilling NAM population was  
256 validated using plant height, flowering time, and grain tannin data. Stepwise regression approach  
257 in TASSEL 5.0 (Glaubitz *et al.* 2014), which uses forward inclusion and backward elimination  
258 stepwise method, was used to perform JLM. Entry and exit limit of the forward and backward  
259 stepwise regressions was 0.001 and threshold cut off was set based on 1000 permutations. JLM  
260 was performed using the following equation:

$$y = b_o + \alpha_f u_f + \sum_{i=1}^k x_i b_i + e_i$$

261 where  $b_0$  is the intercept,  $u_f$  is the effect of the family of founder line  $f$  obtained in the cross with  
262 the common parent (BTx623),  $\alpha_f$  is the coefficient matrix relating  $u_f$  to  $y$ ,  $b_i$  is the effect of the  
263  $i$ th identified locus in the model,  $x_i$  is the incidence vector that relates  $b_i$  to  $y$  and  $k$  is the number  
264 of significant QTL in the final model. Allelic effect for each QTL was expressed relative to the  
265 BTx623 allele, where alleles with positive- or negative-additive effects were derived from  
266 BTx623 or Chinese founders, respectively. Based on the average genome-wide recombination  
267 rate of 2.0 cM/Mb for sorghum (Mace *et al.* 2009; Bouchet *et al.* 2017), QTL for one or more  
268 seedling traits that mapped within a 2 Mb interval were assigned a common name. For example,  
269 *qSbCT04.62* to describe QTL detected on chromosome 4 close to 62 Mb.

#### 270 **Sequence variant analysis**

271 *CBF* and *Tan1* genes, colocalizing with chilling tolerance QTL, were used for sequence variant  
272 analysis. Two overlapping primer pairs were used to amplify these genes from the Chinese  
273 founders (primer sequences are included in Table S2). 50% glycerol and 25mM MgCl<sub>2</sub> were  
274 added to the master mix for stabilizing the PCR reaction. PCR product purification and Sanger  
275 sequencing were performed at GENEWIZ (South Plainfield, NJ). Clustal Omega and ExPasy  
276 translate were used for sequence alignment and predicting the peptide sequences of *CBF1* and  
277 *Tan1* genes.

#### 278 **Ecophysiological crop modeling**

279 CERES-Sorghum crop model (White *et al.* 2015) in the Decision Support Systems for Agro-  
280 technology Transfer-Crop Simulation Model software (Jones *et al.* 2003; Hoogenboom *et al.*  
281 2017) was used to predict the value of early planting for grain sorghum in the Kansas production  
282 environment. This model simulates daily physiological processes using a base temperature of 8°  
283 (White *et al.* 2015) and has effectively predicted sorghum grain yield in Kansas (Staggenborg  
284 and Vanderlip 2005; Araya *et al.* 2018). We consider that this model assumes chilling tolerance  
285 by default, since it does not model damage due to chilling temperatures. A full-season (late-  
286 maturing) photoperiod insensitive grain sorghum hybrid, used in previous crop modelling, was  
287 used in this study (Araya *et al.* 2018). Simulations were performed under rainfed conditions at  
288 four representative Kansas locations, Colby (39.39N, -101.06W), Garden City (37.99N, -  
289 101.81W), Hays (38.84N, -99.34W), and Manhattan (39.20N, -96.55W), from a 30 year period  
290 (1986 to 2015). Historical weather data for each of these locations was obtained from Kansas

291 Mesonet (2019). Simulations were started on January 1 to account for the effect of precipitation  
292 on soil moisture and the onset of soil evaporation. Early (April 15), normal (May 15), and late  
293 (June 15) planting scenarios were simulated, and (i) available precipitation, (ii) days of water  
294 stress after anthesis, and (iii) final grain yield were analyzed.

### 295 **Data availability**

296 Sequencing data are available in the NCBI Sequence Read Archive under project accession  
297 SRP8838986. Field phenotyping data and R analysis scripts are deposited in Dryad Digital  
298 Repository (doi: [Add after acceptance]). Plant materials: The chilling NAM population seeds  
299 will be submitted to the USDA National Plant Germplasm System's Germplasm Resource  
300 Information Network (<https://www.ars-grin.gov/>). Please contact G.B.  
301 (gloria.burow@ars.usda.gov) or the corresponding author for availability.

## 302 **Results**

### 303 **Development of NAM population for chilling tolerance studies**

304 The chilling NAM population was generated from crosses of a US reference line BTx623 with  
305 three Chinese lines, NSZ, Kao, and HKZ (Figure S1). The resulting chilling NAM population ( $n$   
306 = 771) comprised 293, 256, and 222 RILs for the NSZ, Kao, and HKZ families, respectively.  
307 Our chilling tolerance studies of the NAM founders and RILs were based on natural chilling  
308 events in field trials sown 30-45 days earlier than normal. In early-planted field trial (Figures  
309 1A–B) the Chinese founders had significantly greater emergence and seedling vigor ( $P < 0.05$ )  
310 than BTx623 (Figures 1C, 1D, and S4). Chinese founder lines were much taller (~3 m) at  
311 maturity than BTx623 (1.2 m) (Figure 1E), but little variation was observed for flowering time  
312 among the founder lines (4–5 d;  $P < 0.05$ ; Figure 1F). Grain tannins were present in the Chinese  
313 accessions and absent in BTx623 (Figure 1G).

### 314 **Genetic properties of the chilling NAM population**

315 The filtered GBS data set for the chilling NAM population comprised genotypes at 43,320 SNPs.  
316 SNP densities were higher in telomeres than pericentromeric regions (Figure S5A). To check the  
317 population's quality and understand its genetic structure, NAM RILs and founders were projected  
318 onto PCA axes built from a global sorghum diversity panel (Figure 2A), which reflect  
319 geographic origin and botanical race (Harlan *et al.* 1972; Morris *et al.* 2013a). As expected, the  
320 Chinese founders clustered with durra sorghums of Asia and East Africa, while BTx623 was  
321 positioned midway between kafir and caudatum clusters, consistent with its pedigree (Menz *et*  
322 *al.* 2004) (Figure 2A). The three half-sib families of the chilling NAM population were clustered  
323 together, midway between the Chinese founders and BTx623. NJ analysis (Figure S5B) and PCA  
324 (Figure S5C) of the chilling NAM population by itself confirmed the expected family structure  
325 for NSZ and Kao, with each family forming a single cluster. Two clusters were observed for the  
326 HKZ family. We assigned HKZ RILs into HKZa ( $n_{\text{sub}} = 121$ ) or HKZb ( $n_{\text{sub}} = 101$ ) subfamilies,  
327 with the HKZb subfamily representing the cluster with PC1 > 40 (and the longer branch on NJ  
328 dendrogram). The LD rate decay (to genome-wide background) was slower in NAM families  
329 (~500 kb) compared to diverse accessions from China and Ethiopia (~20 kb) (Figure 2B).

### 330 ***Repeatability and heritability of field phenotypes***

331 RILs were scored for emergence and seedling vigor under early- and normal-planted field trials.  
332 Early (EPSV1) and later (EPSV2, EPSV3) seedling vigor ratings were strongly correlated (0.7–  
333 0.8), as were ratings made by different individuals on the same day (0.7–0.8) (Figure S6). By  
334 contrast, the correlation across RILs between early- and normal-planted seedling traits was low  
335 (0.1–0.3). Broad sense heritability ( $H^2$ ) across locations and years for early-planted seedling  
336 traits was intermediate (0.4–0.5) (Table 1), while  $H^2$  was higher (0.5–0.8) for seedling traits from  
337 normal-planted field trials.  $H^2$  for seedling height (in early-planted field trials) was close to zero  
338 (0.03), while plant height at maturity was highly heritable (0.9). Based on the averaged data of  
339 two replicates within each field trial, low to intermediate correlation (0.1–0.4) was observed with  
340 the same seedling trait among locations for early-planted trials (Figure S7).

### 341 ***Composite interval mapping of early-season chilling tolerance***

342 Genetic linkage maps were constructed for each family (NSZ: 1341 markers, 257 RILs; Kao:  
343 1043 markers, 219 RILs; HKZa: 1150 markers, 107 RILs) (Figure S8). Map lengths were similar  
344 for the NSZ, Kao, and HKZa families (1403 cM, 1381 cM, and 1295 cM, respectively) and  
345 individual RILs contained 2–4 crossovers. To map putative chilling tolerance loci, composite  
346 interval mapping (CIM) was first conducted in individual families using ~1000–1300 markers  
347 and early-planted seedling trait BLUPs (EPEC, EPSV1–3). CIM detected 6–8 QTL, which  
348 explained 16–28%, 8–23%, and 12–36% of variation for early-planted seedling traits in the  
349 HKZa, Kao, and NSZ families, respectively (Table S3). The QTL on chromosome 4 was  
350 detected in all NAM families, with the positive allele inherited from the Chinese founder in each  
351 case. CIM of normal-planted seedling BLUPs (NPEC and NPSV1–NPSV3) identified 4–9 QTL  
352 contributing to emergence and SV in the HKZa, Kao, and NSZ families, respectively. Few  
353 overlaps were observed among QTL detected for early- and normal-planted seedling traits  
354 (Tables S3 and S4). As chilling stress varied among locations (Figure S3), QTL mapping was  
355 conducted for each field trial separately to check the stability of QTL across locations. The QTL  
356 on chromosomes 4 and 7 were detected across families in four and two early-planted trials,  
357 respectively.

### 358 ***Joint linkage mapping of early-season chilling tolerance***

359 To leverage data across families, JLM was performed with 43,320 SNPs and field phenotypes  
360 from 750 RILs (including the HKZb family) (Figure 3A–E). JLM of seedling trait BLUPs  
361 (derived from ~12,000 early-planted plots) identified 15 QTL, seven of which were detected for  
362 multiple seedling traits (Figure 3D and Table 2). Each QTL explained 1–9% of phenotypic  
363 variation. In total, the QTL explained 21–41% variation for emergence and seedling vigor.  
364 Positive alleles were inherited from the Chinese founders, except for the allele at chromosome 3.  
365 The QTL on chromosomes 2 and 4 were detected for every early-planted seedling trait. The  
366 chromosome 1 and 5 QTL were detected with all seedling vigor traits, while chromosome 7 and  
367 9 were mapped with two early-planted seedling traits (Figure 3D). The QTL on chromosomes 2  
368 and 4 colocalized (<1 Mb) with classical tannin genes, *Tan2* and *Tan1* (Wu *et al.* 2012; Morris *et*  
369 *al.* 2013b), and chromosomes 7 and 9 loci colocalized with classical dwarfing genes, *Dw3* and

370 *Dw1* (Multani *et al.* 2003; Hilley *et al.* 2016). JLM of normal-planted traits mapped different  
371 QTL for emergence, but few overlapped with QTL for early-planted seedling vigor (Figures 3C  
372 and S9–S12, and Table S5).

373 To check the stability of QTL across locations and years, JLM was performed separately  
374 by location. The QTL on chromosome 9 was detected in three early-planted locations, while  
375 QTL on chromosomes 2 and 7 were mapped in two locations (Figure 3B and S13–S18). The  
376 chromosome 4 QTL was consistently detected across early-planted field locations and years. The  
377 only exception was the MN17 field trial, which emerged under optimal conditions and  
378 experienced chilling one week later, where the chromosome 4 QTL was not detected (Figures 3B  
379 and S16). Among the loci detected with JLM of field phenotypes from early- and normal-planted  
380 individual field trials ((Figures 3A–B), few overlaps were observed.

### 381 **Mapping for agronomic traits and grain tannin**

382 CIM and JLM was conducted to identify loci underlying plant height, flowering time, and grain  
383 tannins. CIM detected three plant height QTL in the HKZa family (Table S6 and Figure S19),  
384 and two each in the NSZ and Kao families, explaining 30–82% of plant height variation. Two  
385 plant height QTL, detected on chromosomes 7 and 9, colocalized with classical dwarfing genes  
386 *Dw3* and *Dw1*, respectively (Multani *et al.* 2003; Hilley *et al.* 2016). JLM identified six plant  
387 height QTL, of which alleles at four and two QTL contained negative and positive effects,  
388 respectively (Figures 3C and S21, and Table 3). Three QTL of major effect explained 85% plant  
389 height variation. Major height loci were 12 kb and 0.1 Mb from *Dw3* and *Dw1* genes,  
390 respectively.

391 Although flowering time varied little among the founders (Figure 1E), transgressive  
392 segregation enabled detection of seven flowering time loci (four, two, and one QTL in the NSZ,  
393 Kao, and HKZa families, respectively) which explain 20–28% of variation (Table S6). JLM with  
394 flowering time detected 10 QTL that explained 33% variation (Figures 3C and S21, and Table  
395 3), three of which co-localized with previously identified flowering time/maturity genes,  
396 *TOC1/CN2*, *mal*, and *CN8*. CIM of grain tannin presence/absence identified a major QTL on  
397 chromosome 4 in each family, with the Chinese parent conferring tannin presence allele in each  
398 case (Figure S20). The locus colocalizing with *Tan1* explained 77, 34, and 100% of grain tannin  
399 variation in the HKZa, NSZ, and Kao families, respectively (Table S6). JLM identified two  
400 tannin loci, one mapped ~70 kb from *Tan1* and the other mapped ~1.4 Mb from an earlier  
401 reported *Tan2* candidate gene (Wu *et al.* 2012; Morris *et al.* 2013b) (Figure S22, and Table 3).

## 402 **Discussion**

### 403 ***A NAM resource to dissect the genetic architecture of chilling tolerance***

404 Characterizing the genetic architecture of adaptive traits provides insight into mechanisms of  
405 adaptation (Orr 2005) and guides strategies for breeding (Bernardo 2008). The NAM approach  
406 has been used to increase power and accuracy for dissection of complex adaptive traits in several  
407 widely adapted crop species (Buckler *et al.* 2009; Nice *et al.* 2016; Bouchet *et al.* 2017). By  
408 using temperate-adapted founders with contrasting chilling responses (Figures 1C, 1D, and S4),  
409 the chilling NAM resource addresses a gap in available sorghum NAM resources (Bouchet *et al.*

410 2017). Together, the chilling NAM and global NAM population (Bouchet *et al.* 2017) make up a  
411 resource of >3000 lines for complex trait dissection in sorghum. Given the founder lines  
412 originated from different botanical races (kafir-caudatum vs. durra; Figure 2A), the chilling  
413 NAM population should harbor abundant diversity for future studies of adaptive traits. Anecdotal  
414 field observations suggest the population harbors variation in vegetative pigmentation, disease  
415 susceptibility, and panicle and stem architecture.

416 The quality of the chilling NAM resource (i.e. RILs and corresponding SNP genotypes)  
417 developed in our study is validated by the precise mapping (<100 kb) of cloned dwarfing (*Dw1*  
418 and *Dw3*) and tannin (*Tan1*) genes (Figure 3, Table 3). Similarly, several major QTL  
419 (*qSbCT04.62*, *qSbCT02.08*, *qSbCT07.59*, and *qSbCT09.57*) were encompassed within the QTL  
420 intervals detected previously (Knoll *et al.* 2008; Burow *et al.* 2010) (Table S7). Notably,  
421 however, the greater population size (~4–5-fold) and marker density (>100-fold) with NAM  
422 relative to earlier studies greatly improved the mapping resolution (>10-fold; Table S7) and  
423 power (i.e. several additional loci identified). Family structure and LD decay of the chilling  
424 NAM population generally matches expectations based on population design and observations  
425 from previous NAM populations (Bouchet *et al.* 2017). Genotypic (Figure 2A) and phenotypic  
426 similarity of HKZa and HKZb RILs suggest that the differentiation is due to residual  
427 heterozygosity in the HKZ founder or pollen contamination from another Chinese accession.  
428 Uncertainty regarding the pedigree of HKZb RILs does not diminish their usefulness as a part of  
429 the NAM resource (e.g. Figure 3).

430 QTL mapping from multi-environment trials clearly identified a major oligogenic  
431 component of chilling tolerance (Figure 3), consistent with previous work (Knoll *et al.* 2008;  
432 Burow *et al.* 2010; Fiedler *et al.* 2016; Ortiz *et al.* 2017). In keeping with the breeding goals, we  
433 considered all QTL that controlled performance under chilling stress (emergence, seedling vigor,  
434 or both) as chilling tolerance loci (Table 2), regardless of whether they also controlled  
435 performance under normal conditions. As chilling tolerance trials were conducted in a field  
436 environment, heritability and QTL effect sizes (Tables 1 and 2) were somewhat reduced  
437 compared to previous experiments under controlled conditions (Knoll *et al.* 2008). While  
438 replicability of field phenotyping for abiotic stress is a major challenge (Araus and Cairns 2014),  
439 observing plant performance under field conditions may increase the likelihood that genetic  
440 discoveries will translate to farmer fields (Cobb *et al.* 2018). A common limitation for molecular  
441 breeding of stress tolerance has been a lack of QTL stability (i.e. QTL × environment  
442 interaction) (Bernardo 2008). The overlapping of multi-environment chilling tolerance QTL  
443 from this study with QTL previously identified in the fields in Texas and Indiana (Table S7)  
444 provides evidence of their stability across a wide range of early-season chilling scenarios.

#### 445 ***The genetic basis of early-season chilling tolerance***

446 Molecular networks for cold sensing and response appear to be largely conserved across plants  
447 (Knight and Knight 2012; Dong *et al.* 2019). These findings are consistent with long-standing  
448 observations of homologous variation in cold tolerance across diverse grasses, including  
449 sorghum (Vavilov 1951). For this reason, we considered whether NAM provides evidence that

450 chilling tolerance in Chinese sorghum is due to derived variation at canonical cold tolerance  
451 genes (e.g. *CBFs*, *COLD1*, *SENSITIVE TO FREEZING2*, etc). Overall, we found little evidence  
452 that the chilling tolerance in Chinese sorghum is due to variation in canonical cold regulators  
453 (i.e. little localization between QTL and sorghum orthologs of known plant cold tolerance  
454 genes). The most significant and consistent QTL (*qSbCT04.62*; Table 2) colocalized with CBF  
455 gene Sobic.004G283201 (120 kb from the peak SNP), ortholog of the canonical Arabidopsis  
456 cold acclimation regulator *CBF1* (Thomashow 2001; Park *et al.* 2015). However, the sequence of  
457 the CBF gene from the Chinese founders revealed no change in their predicted peptide, and a  
458 previous study showed no chilling-responsive expression in chilling-tolerant NSZ (Marla *et al.*  
459 2017). These findings suggest that a different closely linked gene, or the nearby *Tan1* gene,  
460 underlie this chilling tolerance QTL. No other QTL colocalized with orthologs of known plant  
461 cold tolerance genes (Thomashow 2001; Welte *et al.* 2002; Moellering *et al.* 2010).

462 The chilling tolerance QTL observed in our study may represent novel chilling tolerance  
463 mechanisms in sorghum, or conserved mechanisms not yet described in model plants. Fine-  
464 mapping and positional cloning of each chilling tolerance QTL (Ma *et al.* 2015) will be needed  
465 to address these or other hypotheses on the molecular basis of chilling tolerance in sorghum.  
466 Still, the genetic architecture provides some potential clues. Surprisingly, chilling tolerance QTL  
467 colocalized closely with classical tannin (*Tan1* and *Tan2*) and dwarfing genes (*Dw1* and *Dw3*)  
468 (Figure 3), four of the five most important genes under selection by US sorghum breeders in the  
469 20th century (the fifth important gene, not colocalizing with chilling tolerance QTL is *Maturity1*)  
470 (Karper and Quinby 1946; Stephens *et al.* 1967; Wu *et al.* 2012; Morris *et al.* 2013a). This  
471 finding contradicted our original hypothesis of weak coupling-phase linkage of chilling  
472 susceptibility alleles with nontannin and dwarfing alleles. The colocalization itself could be due  
473 to (i) tight linkage (e.g. <1 Mb) of chilling tolerance loci to classical tannin and dwarfing loci or  
474 (ii) pleiotropic effects of classical tannin and dwarfing loci on chilling tolerance.

475 First we considered whether coinheritance of tannin and chilling tolerance alleles could  
476 be due to a pleiotropic effect of seed pigmentation regulators (*Tan1* and *Tan2*) on chilling  
477 tolerance. A conserved MBW ternary complex controls biosynthesis of flavonoids and tannins in  
478 plants via interactions of Myb and bHLH transcription factors with a WD40 transcriptional  
479 regulator (Nesi *et al.* 2000; Gu *et al.* 2011; Gao *et al.* 2018). Among sorghum tannin genes, *Tan1*  
480 encodes the WD40 component (Wu *et al.* 2012) and *Tan2* colocalizes with the bHLH  
481 transcription factor (Sobic.002G076600) (Morris *et al.* 2013b) orthologous to Arabidopsis  
482 *TRANSPARENT TESTA8* (*AtTT8*) and rice red grain gene (*OsRc*) (Nesi *et al.* 2000; Gu *et al.*  
483 2011). The MBW complex has pleiotropic effects on abscisic acid-mediated seed dormancy and  
484 polyphenol-mediated protection from soil-borne pathogens (Helsper *et al.* 1994; Gu *et al.* 2011;  
485 Jia *et al.* 2012), which could contribute to emergence and seedling vigor under chilling. The  
486 chilling tolerance QTL *qSbCT02.08* detected in JLM of nontannin RILs (Figure S23) suggests  
487 that early-season chilling tolerance does not require seed tannins, even if the trait is under the  
488 control of the MBW complex. The existence of a Chinese accession Gai Gaoliang (PI 610727)  
489 that is chilling-tolerant but lacks grain tannins (Burow *et al.* 2010) supports this hypothesis.

490 Next we considered whether plant height alleles (*Dw1* and *Dw3*) could have pleiotropic  
491 effects on chilling tolerance that explain their colocalization with *qSbCT07.59* and *qSbCT09.57*  
492 (Figure S9). *Dw1*, which colocalized with *qSbCT09.57*, encodes a novel component of  
493 brassinosteroid (BR) signaling (Hirano *et al.* 2017). BR signaling controls cold tolerance  
494 mechanisms in tomato (Xia *et al.* 2018) and Arabidopsis (Eremina *et al.* 2016) so colocalization  
495 of *qSbCT09.57* with *Dw1* could reflect a pleiotropic chilling tolerance effect of DW1 BR  
496 signaling. *Dw3*, which colocalized with *qSbCT07.59*, encodes an auxin transporter. However, to  
497 our knowledge, no reports have demonstrated a role of auxin signaling in chilling tolerance.

#### 498 ***Origins and consequences of the genetic architecture of chilling tolerance***

499 Chilling sensitivity of US sorghum has generally been understood to be a result of sorghum's  
500 tropical origin (Stickler *et al.* 1962; Knoll *et al.* 2008) (Figure 4A), in keeping with a classic  
501 phytogeographic model (Vavilov 1951). Under this model, ancestrally chilling-sensitive African  
502 sorghums would have adapted to cold upon diffusion to temperate regions in central Asia and  
503 northern China (c. 800 years ago) due to derived alleles (Kimber 2000). However, our finding  
504 that chilling tolerance alleles coinherited with the ancestral wildtype alleles of classical tannin  
505 and dwarfing genes, which are widespread in both African and Chinese sorghums, contradicts  
506 this original model.

507 Instead, a revised model for derived chilling sensitivity of US sorghum and inadvertent  
508 selection may be more parsimonious (Figure 4B). Under this model, the African sorghums  
509 introduced into the US harbored basal chilling tolerance, but chilling sensitivity was  
510 inadvertently selected along with loss-of-function alleles at *tan1* and *tan2* (from African standing  
511 variation), and *dw1* and *dw3* (from *de novo* mutations in US) (Multani *et al.* 2003; Morris *et al.*  
512 2013b; Hilley *et al.* 2016). Supporting this revised model, 38 RILs selected for agronomic  
513 suitability by the sorghum breeder (R.P.) were fixed for the chilling-susceptibility alleles (at  
514 *qSbCT09.57* and *qSbCT07.59*) that are coinherited with desired *dw1* and *dw3* alleles,  
515 respectively (Table S8). Thus, coinheritance of chilling susceptibility with desired traits likely  
516 stymied >50 years of chilling tolerance breeding in this crop (Stickler *et al.* 1962; Tiryaki and  
517 Andrews 2001; Yu and Tuinstra 2001; Knoll and Ejeta 2008; Burow *et al.* 2010; Kapanigowda *et*  
518 *al.* 2013).

519 A genotype-to-phenotype modeling approach, which couples genetic and  
520 ecophysiological modeling, can help assess the potential value of genotypes in a crop's target  
521 population of environments (Cooper *et al.* 2014). Preliminary ecophysiological modeling  
522 suggests that (were it not for chilling sensitivity) a standard grain sorghum hybrid could escape  
523 drought and have higher yields (~5%) if planted 30–60 days early (Figure S24). The improved  
524 power and resolution with the chilling NAM provides several new paths to obtain chilling  
525 tolerance while bypassing undesirable characteristics from Chinese sorghum. Several chilling  
526 tolerance alleles (at *qSbCT05.04*, *qSbCT07.10*, *qSbCT01.13*, and *qSbCT01.57*) are not  
527 coinherited with undesirable alleles for tannins and height (Figure 3) and can be used directly in  
528 marker-assisted introgression. Complementary dominance of *Tan1* and non-functional *tan2* (Wu  
529 *et al.* 2012) can be exploited to develop chilling-tolerant sorghums that retain the nontannin

530 phenotype. If the standard model is correct (Figure 4A), rare recombinants identified with high-  
531 density markers will decouple chilling tolerance alleles from undesirable wildtype alleles of  
532 tannin and dwarfing genes and bypass undesirable coinheritance. If the revised model is correct  
533 (Figure 4B), antagonistic pleiotropic effects could be bypassed with novel tannin biosynthesis  
534 mutations to disrupt tannin production in *Tan1Tan2* chilling-tolerant background and novel  
535 dwarfing mutants (Jiao *et al.* 2016) in *Dw1Dw3* chilling-tolerant background.

### 536 **Conclusions**

537 Genetic tradeoffs caused by linkage drag have long been appreciated by geneticists and breeders  
538 (Zhu *et al.* 2018; Cobb *et al.* 2018). More recently, genetic tradeoffs due to antagonistic  
539 pleiotropy or conditional neutrality (Anderson *et al.* 2011) have been revealed by positional  
540 cloning of key agronomic genes (i.e. those under strong selection in 20th century breeding  
541 programs). For instance, antagonistic pleiotropic effects were identified for key improvement  
542 alleles of rice *semi-dwarf1* (Li *et al.* 2018) and tomato *jointless* (Soyk *et al.* 2017). In elite rice  
543 germplasm, conditional neutrality led to unintentional fixation of a drought-susceptibility allele  
544 at *Deeper rooting1* (Uga *et al.* 2013). Similarly, our findings suggest that strong selection for  
545 nontannin alleles (*tan1* and *tan2*) and dwarfing alleles (*dw1* and *dw3*) in grain sorghum in the  
546 20th century inadvertently resulted in the loss of early-season chilling tolerance, due either (i) to  
547 tight repulsion-phase linkage of desired alleles (Figure 4A) or (ii) antagonistic pleiotropic effects  
548 of desired alleles on chilling susceptibility (Figure 4B). Given increasing evidence of genetic  
549 tradeoffs for genes under strong directional selection, characterizing both the genetic architecture  
550 and molecular basis of adaptive variation will be critical to guide genomics-enabled breeding and  
551 understand adaptive mechanisms.

### 552 **Author Contributions**

553 The study was conceived by G.B. and G.M. The population was developed by G.B, R.C, and  
554 C.H. Data collection was by S.M., T.F., and R.P. Data was analyzed by S.M., T.F., Z.H., and  
555 M.O. Crop simulations were done by R.R. The paper was written by S.M. and G.M. All authors  
556 edited and approved the manuscript.

### 557 **Acknowledgements**

558 The authors would like to thank Halee Hughes and Matt Davis for excellent technical support.  
559 Development of the NAM was supported by USDA ARS CRIS#3096-21000-021-00D and  
560 United Sorghum Checkoff Program (USCP) Grant on “Sorghum Genetic Enhancement” to  
561 USDA-ARS, Lubbock, TX. Dr. Ratan Chopra was supported by the grant from United Sorghum  
562 Checkoff Program. The study was supported by the Kansas Grain Sorghum Commission and  
563 Kansas Department of Agriculture. The study was carried out using the Beocat high-performance  
564 computing facility and Integrated Genomics Facility at Kansas State University. This study is  
565 contribution no. [add after acceptance] from the Kansas Agricultural Experiment Station.  
566



567 **Literature cited**

- 568 Anderson J. T., J. H. Willis, and T. Mitchell-Olds, 2011 Evolutionary genetics of plant  
569 adaptation. *Trends Genet.* 27: 258–266. <https://doi.org/10.1016/j.tig.2011.04.001>
- 570 Araus J. L., and J. E. Cairns, 2014 Field high-throughput phenotyping: the new crop breeding  
571 frontier. *Trends Plant Sci.* 19: 52–61. <https://doi.org/10.1016/j.tplants.2013.09.008>
- 572 Barrett R. D. H., and D. Schluter, 2008 Adaptation from standing genetic variation. *Trends Ecol.*  
573 *Evol.* 23: 38–44. <https://doi.org/10.1016/j.tree.2007.09.008>
- 574 Bates D., M. Mächler, B. Bolker, and S. Walker, 2015 Fitting Linear Mixed-Effects Models  
575 Using lme4. *J. Stat. Softw.* <https://doi.org/10.18637/jss.v067.i01>
- 576 Bernardo R., 2008 Molecular markers and selection for complex traits in plants: Learning from  
577 the last 20 years. *Crop Sci.* 48: 1649. <https://doi.org/10.2135/cropsci2008.03.0131>
- 578 Bouchet S., M. O. Olatoye, S. R. Marla, R. Perumal, T. Tesso, *et al.*, 2017 Increased power to  
579 dissect adaptive traits in global sorghum diversity using a nested association mapping  
580 population. *Genetics* 206: 573–585. <https://doi.org/10.1534/genetics.116.198499>
- 581 Boyles R. E., B. K. Pfeiffer, E. A. Cooper, B. L. Rauh, K. J. Zielinski, *et al.*, 2017 Genetic  
582 dissection of sorghum grain quality traits using diverse and segregating populations.  
583 *Theor. Appl. Genet.* 130: 697–716. <https://doi.org/10.1007/s00122-016-2844-6>
- 584 Broman K. W., H. Wu, S. Sen, and G. A. Churchill, 2003 R/qtl: QTL mapping in experimental  
585 crosses. *Bioinforma. Oxf. Engl.* 19: 889–890.
- 586 Browning B. L., and S. R. Browning, 2013 Improving the Accuracy and Efficiency of Identity-  
587 by-Descend Detection in Population Data. *Genetics* 194: 459–471.  
588 <https://doi.org/10.1534/genetics.113.150029>
- 589 Browning B. L., and S. R. Browning, 2016 Genotype Imputation with Millions of Reference  
590 Samples. *Am. J. Hum. Genet.* 98: 116–126. <https://doi.org/10.1016/j.ajhg.2015.11.020>
- 591 Buckler E. S., J. B. Holland, P. J. Bradbury, C. B. Acharya, P. J. Brown, *et al.*, 2009 The genetic  
592 architecture of maize flowering time. *Science* 325: 714–718.  
593 <https://doi.org/10.1126/science.1174276>
- 594 Burow G., J. J. Burke, Z. Xin, and C. D. Franks, 2010 Genetic dissection of early-season cold  
595 tolerance in sorghum (*Sorghum bicolor* (L.) Moench). *Mol. Breed.* 28: 391–402.  
596 <https://doi.org/10.1007/s11032-010-9491-4>
- 597 Cobb J. N., P. S. Biswas, and J. D. Platten, 2018 Back to the future: revisiting MAS as a tool for  
598 modern plant breeding. *Theor. Appl. Genet.* <https://doi.org/10.1007/s00122-018-3266-4>
- 599 Cooper M., C. D. Messina, D. Podlich, L. R. Totir, A. Baumgarten, *et al.*, 2014 Predicting the  
600 future of plant breeding: complementing empirical evaluation with genetic prediction.  
601 *Crop Pasture Sci.* 65: 311–336.
- 602 Cramer W., D. W. Kicklighter, A. Bondeau, B. M. Iii, G. Churkina, *et al.*, 1999 Comparing  
603 global models of terrestrial net primary productivity (NPP): overview and key results.  
604 *Glob. Change Biol.* 5: 1–15. <https://doi.org/10.1046/j.1365-2486.1999.00009.x>
- 605 Elshire R. J., J. C. Glaubitz, Q. Sun, J. A. Poland, K. Kawamoto, *et al.*, 2011 A Robust, Simple  
606 Genotyping-by-Sequencing (GBS) Approach for High Diversity Species. *PLOS ONE* 6:

- 607 e19379. <https://doi.org/10.1371/journal.pone.0019379>
- 608 Eremina M., S. J. Unterholzner, A. I. Rathnayake, M. Castellanos, M. Khan, *et al.*, 2016  
609 Brassinosteroids participate in the control of basal and acquired freezing tolerance of  
610 plants. *Proc. Natl. Acad. Sci.* 113: E5982–E5991.  
611 <https://doi.org/10.1073/pnas.1611477113>
- 612 Fiedler K., W. A. Bekele, C. Matschegewski, R. Snowdon, S. Wieckhorst, *et al.*, 2016 Cold  
613 tolerance during juvenile development in sorghum: a comparative analysis by  
614 genomewide association and linkage mapping. *Plant Breed.* 135: 598–606.  
615 <https://doi.org/10.1111/pbr.12394>
- 616 Franks C. D., G. B. Burow, and J. J. Burke, 2006 A comparison of U.S. and Chinese sorghum  
617 germplasm for early season cold tolerance. *Crop Sci.* 46: 1371–1376.  
618 <https://doi.org/10.2135/cropsci2005.08-0279>
- 619 Gao Y., J. Liu, Y. Chen, H. Tang, Y. Wang, *et al.*, 2018 Tomato SIAN11 regulates flavonoid  
620 biosynthesis and seed dormancy by interaction with bHLH proteins but not with MYB  
621 proteins. *Hortic. Res.* 5: 27. <https://doi.org/10.1038/s41438-018-0032-3>
- 622 Glaubitz J. C., T. M. Casstevens, F. Lu, J. Harriman, R. J. Elshire, *et al.*, 2014 TASSEL-GBS: A  
623 High Capacity Genotyping by Sequencing Analysis Pipeline. *PLOS ONE* 9: e90346.  
624 <https://doi.org/10.1371/journal.pone.0090346>
- 625 Grain sorghum production handbook, 1998 Grain Sorghum Prod. Handb. Kans. State Univ.
- 626 Gu X.-Y., M. E. Foley, D. P. Horvath, J. V. Anderson, J. Feng, *et al.*, 2011 Association between  
627 seed dormancy and pericarp color is controlled by a pleiotropic gene that regulates  
628 abscisic acid and flavonoid synthesis in weedy red rice. *Genetics* 189: 1515–1524.  
629 <https://doi.org/10.1534/genetics.111.131169>
- 630 Harlan J. R., J. M. J. de Wet, and J. M. J., 1972 A simplified classification of cultivated sorghum.  
631 *Crop Sci.* 12: 172–176. <https://doi.org/10.2135/cropsci1972.0011183X001200020005x>
- 632 Helsper J. P. F. G., A. V. Norel, K. Burger-Meyer, and J. M. Hoogendijk, 1994 Effect of the  
633 absence of condensed tannins in faba beans (*Vicia faba*) on resistance to foot rot,  
634 *Ascochyta* blight and chocolate spot. *J. Agric. Sci.* 123: 349–355.  
635 <https://doi.org/10.1017/S0021859600070350>
- 636 Hilley J., S. Truong, S. Olson, D. Morishige, and J. Mullet, 2016 Identification of Dw1, a  
637 regulator of sorghum stem internode length. *PLOS ONE* 11: e0151271.  
638 <https://doi.org/10.1371/journal.pone.0151271>
- 639 Hilley J. L., B. D. Weers, S. K. Truong, R. F. McCormick, A. J. Mattison, *et al.*, 2017 Sorghum  
640 Dw2 encodes a protein kinase regulator of stem internode length. *Sci. Rep.* 7: 4616.  
641 <https://doi.org/10.1038/s41598-017-04609-5>
- 642 Hirano K., M. Kawamura, S. Araki-Nakamura, H. Fujimoto, K. Ohmae-Shinohara, *et al.*, 2017  
643 Sorghum DW1 positively regulates brassinosteroid signaling by inhibiting the nuclear  
644 localization of BRASSINOSTEROID INSENSITIVE 2. *Sci. Rep.* 7: 126.  
645 <https://doi.org/10.1038/s41598-017-00096-w>
- 646 Holland J. B., W. E. Nyquist, and C. T. Cervantes-Martínez, 2003 Estimating and interpreting

- 647 heritability for plant breeding: an update, pp. 9–112 in *Plant Breeding Reviews*, edited by  
648 Janick J. John Wiley & Sons, Inc., Hoboken, NJ.
- 649 Hu Y., L. Jiang, F. Wang, and D. Yu, 2013 Jasmonate regulates the inducer of cbf expression-C-  
650 repeat binding factor/DRE binding factor1 cascade and freezing tolerance in Arabidopsis.  
651 *Plant Cell* 25: 2907–2924. <https://doi.org/10.1105/tpc.113.112631>
- 652 Hu Z., M. O. Olatoye, S. Marla, and G. P. Morris, 2019 An integrated genotyping-by-sequencing  
653 polymorphism map for over 10,000 sorghum genotypes. *Plant Genome* 12.  
654 <https://doi.org/10.3835/plantgenome2018.06.0044>
- 655 Jia L., Q. Wu, N. Ye, R. Liu, L. Shi, *et al.*, 2012 Proanthocyanidins inhibit seed germination by  
656 maintaining a high level of abscisic acid in Arabidopsis thaliana. *J. Integr. Plant Biol.* 54:  
657 663–673. <https://doi.org/10.1111/j.1744-7909.2012.01142.x>
- 658 Jiao Y., J. Burke, R. Chopra, G. Burow, J. Chen, *et al.*, 2016 A sorghum mutant resource as an  
659 efficient platform for gene discovery in grasses. *Plant Cell* 28: 1551–1562.  
660 <https://doi.org/10.1105/tpc.16.00373>
- 661 Kapanigowda M. H., R. Perumal, R. M. Aiken, T. J. Herald, S. R. Bean, *et al.*, 2013 Analyses of  
662 sorghum [*Sorghum bicolor* (L.) Moench] lines and hybrids in response to early-season  
663 planting and cool conditions. *Can. J. Plant Sci.* 93: 773–784.  
664 <https://doi.org/10.4141/cjps2012-311>
- 665 Karper R. E., and J. R. Quinby, 1946 The history and evolution of milo in the United States.  
666 *Agron. J.* 38: 441–453. <https://doi.org/10.2134/agronj1946.00021962003800050007x>
- 667 Kimber C. T., 2000 Origins of domesticated sorghum and its early diffusion to India and China,  
668 pp. 3–98 in *Sorghum: Origin, History, Technology, and Production*, edited by Smith C.  
669 W., Frederiksen R. A. John Wiley and Sons.
- 670 Knoll J., N. Gunaratna, and G. Ejeta, 2008 QTL analysis of early-season cold tolerance in  
671 sorghum. *Theor. Appl. Genet.* 116: 577–587. <https://doi.org/10.1007/s00122-007-0692-0>
- 672 Knoll J., and G. Ejeta, 2008 Marker-assisted selection for early-season cold tolerance in  
673 sorghum: QTL validation across populations and environments. *Theor. Appl. Genet.* 116:  
674 541–553. <https://doi.org/10.1007/s00122-007-0689-8>
- 675 Lasky J. R., H. D. Upadhyaya, P. Ramu, S. Deshpande, C. T. Hash, *et al.*, 2015 Genome-  
676 environment associations in sorghum landraces predict adaptive traits. *Sci. Adv.* 1:  
677 e1400218. <https://doi.org/10.1126/sciadv.1400218>
- 678 Li W., M. Li, W. Zhang, R. Welti, and X. Wang, 2004 The plasma membrane-bound  
679 phospholipase Ddelta enhances freezing tolerance in Arabidopsis thaliana. *Nat.*  
680 *Biotechnol.* 22: 427–433. <https://doi.org/10.1038/nbt949>
- 681 Li S., Y. Tian, K. Wu, Y. Ye, J. Yu, *et al.*, 2018 Modulating plant growth–metabolism  
682 coordination for sustainable agriculture. *Nature* 1. <https://doi.org/10.1038/s41586-018-0415-5>
- 683
- 684 Long S. P., and A. K. Spence, 2013 Toward cool C4 crops. *Annu. Rev. Plant Biol.* 64: 701–722.  
685 <https://doi.org/10.1146/annurev-arplant-050312-120033>
- 686 Lyons J. M., 1973 Chilling Injury in Plants. *Annu. Rev. Plant Physiol.* 24: 445–466.

- 687 <https://doi.org/10.1146/annurev.pp.24.060173.002305>
- 688 Ma Y., X. Dai, Y. Xu, W. Luo, X. Zheng, *et al.*, 2015 COLD1 confers chilling tolerance in rice.  
689 Cell 160: 1209–1221. <https://doi.org/10.1016/j.cell.2015.01.046>
- 690 Mace E. S., J.-F. Rami, S. Bouchet, P. E. Klein, R. R. Klein, *et al.*, 2009 A consensus genetic  
691 map of sorghum that integrates multiple component maps and high-throughput Diversity  
692 Array Technology (DART) markers. BMC Plant Biol. 9: 13. [https://doi.org/10.1186/1471-](https://doi.org/10.1186/1471-2229-9-13)  
693 2229-9-13
- 694 Mao D., Y. Xin, Y. Tan, X. Hu, J. Bai, *et al.*, 2019 Natural variation in the HAN1 gene confers  
695 chilling tolerance in rice and allowed adaptation to a temperate climate. Proc. Natl. Acad.  
696 Sci. 201819769. <https://doi.org/10.1073/pnas.1819769116>
- 697 McCormick R. F., S. K. Truong, A. Sreedasyam, J. Jenkins, S. Shu, *et al.*, 2018 The Sorghum  
698 bicolor reference genome: improved assembly, gene annotations, a transcriptome atlas,  
699 and signatures of genome organization. Plant J. <https://doi.org/10.1111/tpj.13781>
- 700 Menz M. A., R. R. Klein, N. C. Unruh, W. L. Rooney, P. E. Klein, *et al.*, 2004 Genetic diversity  
701 of public inbreds of sorghum determined by mapped AFLP and SSR markers. Crop Sci.  
702 44: 1236. <https://doi.org/10.2135/cropsci2004.1236>
- 703 Meyer R. S., and M. D. Purugganan, 2013 Evolution of crop species: genetics of domestication  
704 and diversification. Nat. Rev. Genet. 14: 840–852. <https://doi.org/10.1038/nrg3605>
- 705 Moellering E. R., B. Muthan, and C. Benning, 2010 Freezing tolerance in plants requires lipid  
706 remodeling at the outer chloroplast membrane. Science 330: 226–228.  
707 <https://doi.org/10.1126/science.1191803>
- 708 Morris G. P., P. Ramu, S. P. Deshpande, C. T. Hash, T. Shah, *et al.*, 2013a Population genomic  
709 and genome-wide association studies of agroclimatic traits in sorghum. Proc. Natl. Acad.  
710 Sci. 110: 453–458. <https://doi.org/10.1073/pnas.1215985110>
- 711 Morris G. P., D. H. Rhodes, Z. Brenton, P. Ramu, V. M. Thayil, *et al.*, 2013b Dissecting  
712 genome-wide association signals for loss-of-function phenotypes in sorghum flavonoid  
713 pigmentation traits. G3 Genes Genomes Genet. 3: 2085–2094.  
714 <https://doi.org/10.1534/g3.113.008417>
- 715 Multani D. S., S. P. Briggs, M. A. Chamberlin, J. J. Blakeslee, A. S. Murphy, *et al.*, 2003 Loss of  
716 an MDR transporter in compact stalks of maize br2 and sorghum dw3 mutants. Science  
717 302: 81–84. <https://doi.org/10.1126/science.1086072>
- 718 Nesi N., I. Debeaujon, C. Jond, G. Pelletier, M. Caboche, *et al.*, 2000 The TT8 gene encodes a  
719 basic helix-loop-helix domain protein required for expression of DFR and BAN genes in  
720 Arabidopsis siliques. Plant Cell 12: 1863–1878. <https://doi.org/10.1105/tpc.12.10.1863>
- 721 Nice L. M., B. J. Steffenson, G. L. Brown-Guedira, E. D. Akhunov, C. Liu, *et al.*, 2016  
722 Development and genetic characterization of an advanced backcross-nested association  
723 mapping (AB-NAM) population of wild × cultivated barley. Genetics 203: 1453–1467.  
724 <https://doi.org/10.1534/genetics.116.190736>
- 725 Olsen K. M., and J. F. Wendel, 2013 Crop plants as models for understanding plant adaptation  
726 and diversification. Front. Plant Evol. Dev. 4: 290.

- 727 <https://doi.org/10.3389/fpls.2013.00290>
- 728 Orr H. A., 2005 The genetic theory of adaptation: a brief history. *Nat. Rev. Genet.* 6: 119–127.
- 729 <https://doi.org/10.1038/nrg1523>
- 730 Ortiz D., J. Hu, and M. G. Salas Fernandez, 2017 Genetic architecture of photosynthesis in
- 731 *Sorghum bicolor* under non-stress and cold stress conditions. *J. Exp. Bot.* *erx276*.
- 732 <https://doi.org/10.1093/jxb/erx276>
- 733 Paaby A. B., and M. V. Rockman, 2013 The many faces of pleiotropy. *Trends Genet.* 29: 66–73.
- 734 <https://doi.org/10.1016/j.tig.2012.10.010>
- 735 Park S., C.-M. Lee, C. J. Doherty, S. J. Gilmour, Y. Kim, *et al.*, 2015 Regulation of the
- 736 *Arabidopsis* CBF regulon by a complex low-temperature regulatory network. *Plant J.* 82:
- 737 193–207. <https://doi.org/10.1111/tpj.12796>
- 738 Paterson A. H., J. E. Bowers, R. Bruggmann, I. Dubchak, J. Grimwood, *et al.*, 2009 The
- 739 *Sorghum bicolor* genome and the diversification of grasses. *Nature* 457: 551–556.
- 740 <https://doi.org/10.1038/nature07723>
- 741 Soyk S., Z. H. Lemmon, M. Oved, J. Fisher, K. L. Liberatore, *et al.*, 2017 Bypassing negative
- 742 epistasis on yield in tomato imposed by a domestication gene. *Cell* 169: 1142–1155.e12.
- 743 <https://doi.org/10.1016/j.cell.2017.04.032>
- 744 Stephens J. C., F. R. Miller, and D. T. Rosenow, 1967 Conversion of alien sorghums to early
- 745 combine genotypes. *Crop Sci.* 7: 396.
- 746 <https://doi.org/10.2135/cropsci1967.0011183X000700040036x>
- 747 Stickler F. C., A. W. Pauli, and A. J. Casady, 1962 Comparative responses of kaoliang and other
- 748 grain sorghum types to temperature. *Crop Sci.* 2: 136.
- 749 <https://doi.org/10.2135/cropsci1962.0011183X000200020015x>
- 750 Thomashow M. F., 2001 So What’s New in the Field of Plant Cold Acclimation? Lots! *Plant*
- 751 *Physiol.* 125: 89–93.
- 752 Tiriyaki I., and D. J. Andrews, 2001 Germination and seedling cold tolerance in sorghum: II.
- 753 Parental lines and hybrids. *Agron. J.* 93: 1391. <https://doi.org/10.2134/agronj2001.1391>
- 754 Tuberosa R., 2012 Phenotyping for drought tolerance of crops in the genomics era. *Front.*
- 755 *Physiol.* 3. <https://doi.org/10.3389/fphys.2012.00347>
- 756 Uga Y., K. Sugimoto, S. Ogawa, J. Rane, M. Ishitani, *et al.*, 2013 Control of root system
- 757 architecture by DEEPER ROOTING 1 increases rice yield under drought conditions. *Nat.*
- 758 *Genet.* 45: 1097–1102. <https://doi.org/10.1038/ng.2725>
- 759 Vavilov N. I., 1951 The origin, variation, immunity and breeding of cultivated plants, translated
- 760 from the Russian by K. Starr Chester. *Chron. Bot.*
- 761 Wang X., L. Wang, Y. Wang, H. Liu, D. Hu, *et al.*, 2018 *Arabidopsis* PCaP2 Plays an Important
- 762 Role in Chilling Tolerance and ABA Response by Activating CBF- and SnRK2-
- 763 Mediated Transcriptional Regulatory Network. *Front. Plant Sci.* 9.
- 764 <https://doi.org/10.3389/fpls.2018.00215>
- 765 Welti R., W. Li, M. Li, Y. Sang, H. Biesiada, *et al.*, 2002 Profiling Membrane Lipids in Plant
- 766 Stress Responses ROLE OF PHOSPHOLIPASE D $\alpha$  IN FREEZING-INDUCED LIPID

- 767 CHANGES IN ARABIDOPSIS. *J. Biol. Chem.* 277: 31994–32002.
- 768 Wu Y., X. Li, W. Xiang, C. Zhu, Z. Lin, *et al.*, 2012 Presence of tannins in sorghum grains is  
769 conditioned by different natural alleles of Tannin1. *Proc. Natl. Acad. Sci.* 109: 10281–  
770 10286. <https://doi.org/10.1073/pnas.1201700109>
- 771 Xia X.-J., P.-P. Fang, X. Guo, X.-J. Qian, J. Zhou, *et al.*, 2018 Brassinosteroid-mediated  
772 apoplastic H<sub>2</sub>O<sub>2</sub>-glutaredoxin 12/14 cascade regulates antioxidant capacity in response  
773 to chilling in tomato. *Plant Cell Environ.* 41: 1052–1064.  
774 <https://doi.org/10.1111/pce.13052>
- 775 Yu J., and M. R. Tuinstra, 2001 Genetic analysis of seedling growth under cold temperature  
776 stress in grain sorghum. *Crop Sci.* 41: 1438–1443.  
777 <https://doi.org/10.2135/cropsci2001.4151438x>
- 778 Zeng Z. B., 1994 Precision mapping of quantitative trait loci. *Genetics* 136: 1457–1468.
- 779 Zhang C., S.-S. Dong, J.-Y. Xu, W.-M. He, and T.-L. Yang, 2018 PopLDdecay: a fast and  
780 effective tool for linkage disequilibrium decay analysis based on variant call format files.  
781 *Bioinformatics.* <https://doi.org/10.1093/bioinformatics/bty875>
- 782 Zhu G., S. Wang, Z. Huang, S. Zhang, Q. Liao, *et al.*, 2018 Rewiring of the fruit metabolome in  
783 tomato breeding. *Cell* 172: 249-261.e12. <https://doi.org/10.1016/j.cell.2017.12.019>

784

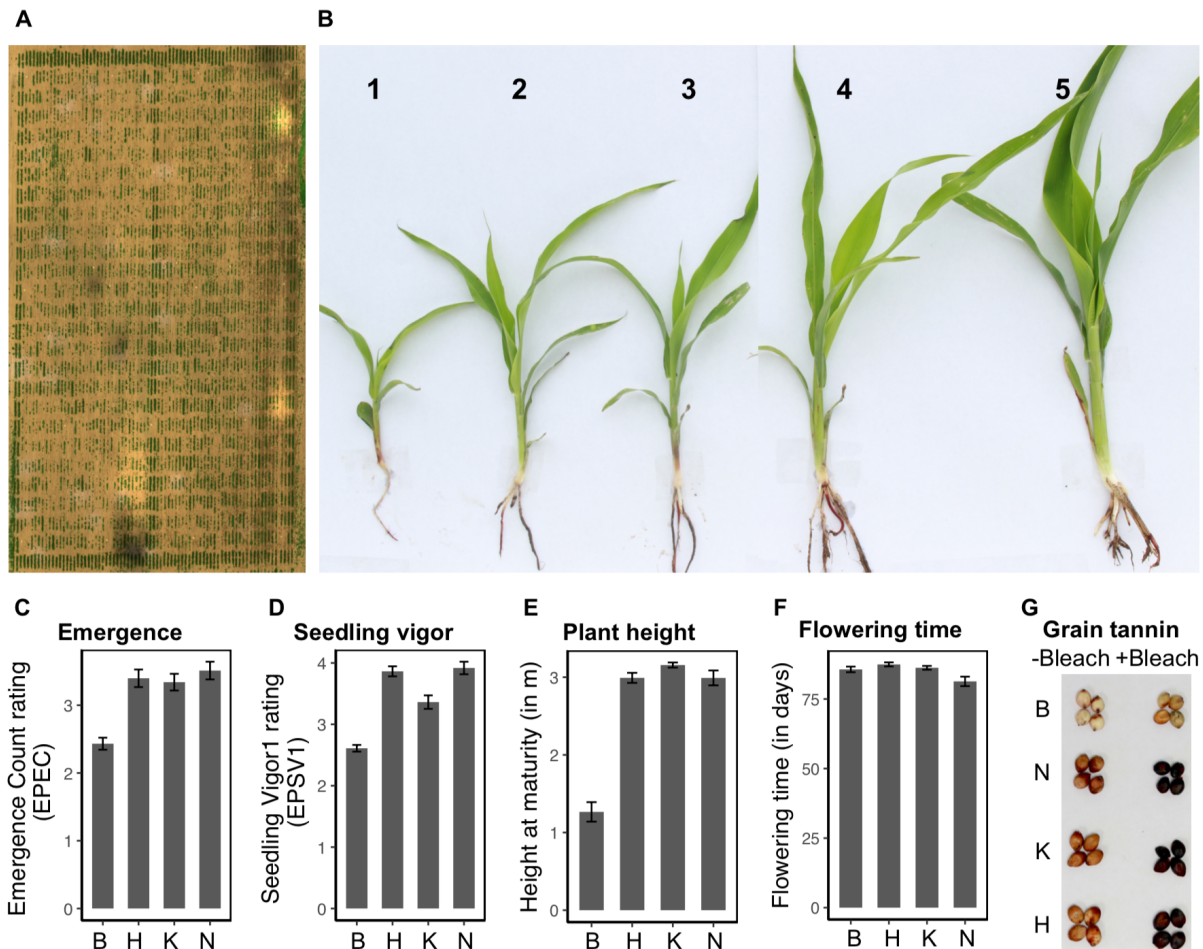

785

786 **Figure 1. Chinese sorghums harbor early-season chilling tolerance and characteristics**  
787 **undesirable for US grain sorghums.**

788 (A) Aerial image of an early-planted field (AB17) trial for chilling tolerance phenotyping based  
789 on stitched RGB imagery (B) Seedling vigor rating used in field trials. In early-planted field  
790 trials, differences were observed in (C) emergence and (D) seedling vigor between the four  
791 NAM founders, B (BTx623), K (Kao), H (HKZ), and N (NSZ). Additionally, (E) significant  
792 variation in plant height at maturity, (F) no significant difference in flowering time (days after  
793 emergence), and (G) presence/absence variation in grain tannins were observed.

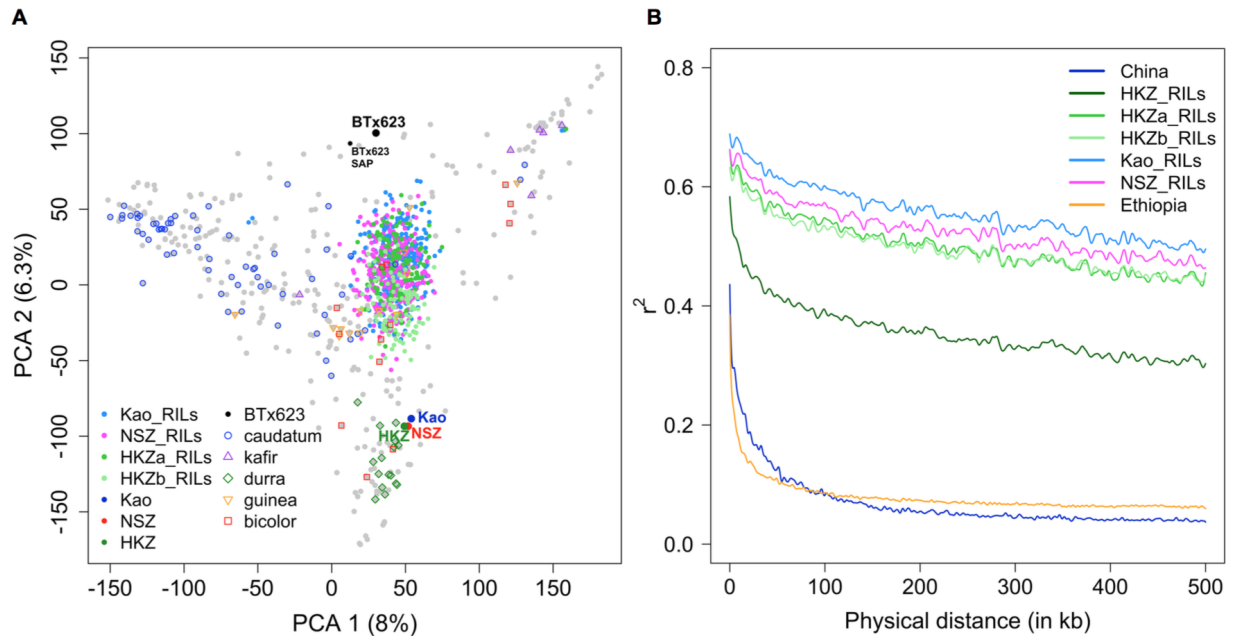

794

795 **Figure 2. Genetic properties of the chilling NAM population**

796 (A) Principal component analysis (PCA) of the NAM ( $n_{RIL} = 771$ ) plotted on PCA axes built  
797 with 401 accessions of the global sorghum diversity germplasm. Major botanical races  
798 (Caudatum, Kafir, Durra, Guinea, and Bicolor) of global accessions are noted with symbols (B)  
799 Linkage disequilibrium (LD) decay of the NSZ, HKZa, HKZb, and Kao families. LD decay rate  
800 of diverse accessions from China ( $n = 29$ ) and Ethiopia ( $n = 176$ ) are presented for comparison.  
801



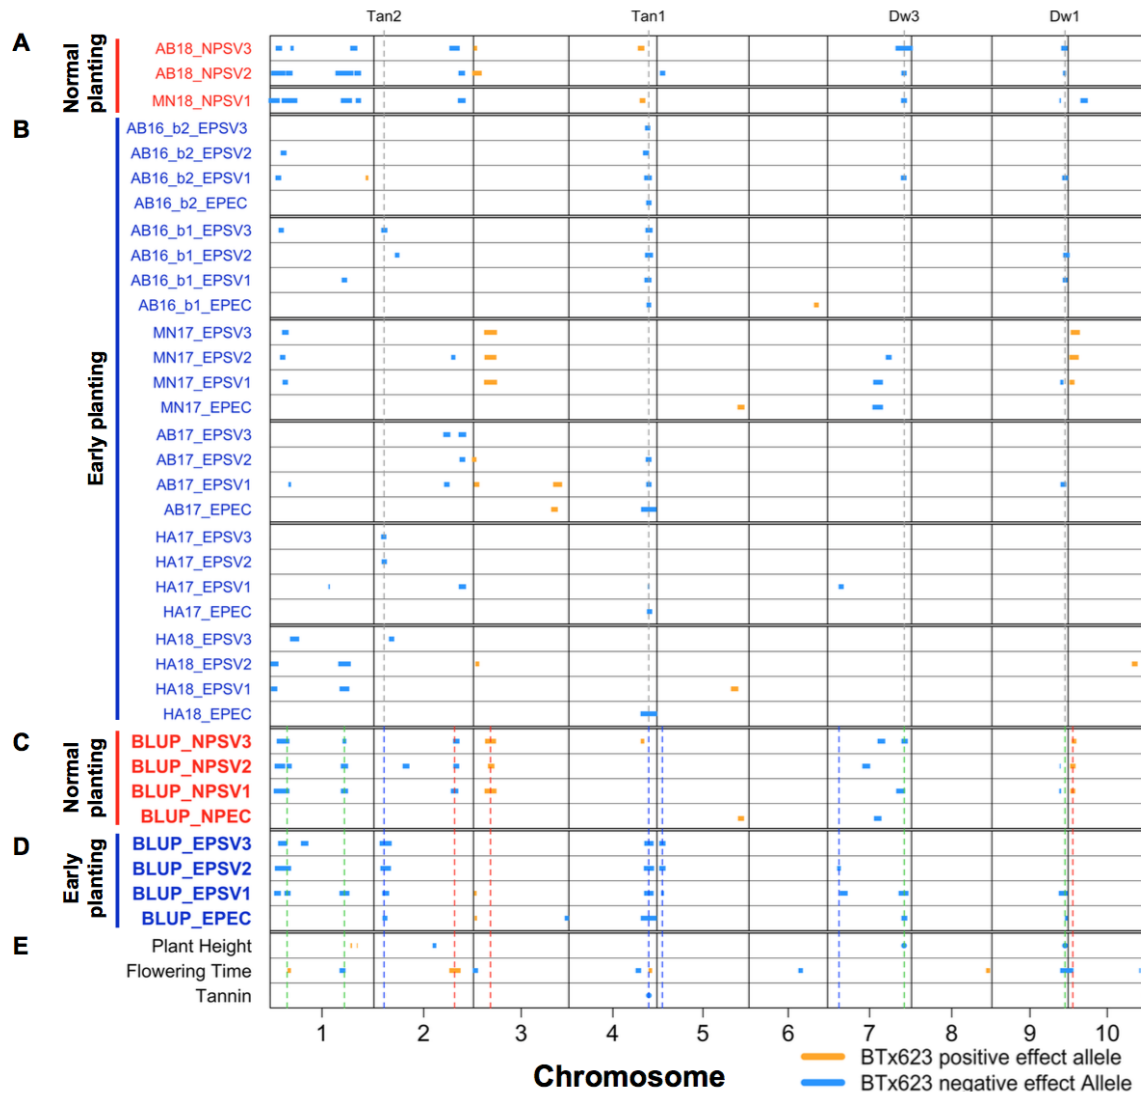

802

803 **Figure 3. Joint linkage mapping (JLM) of chilling tolerance and undesirable traits**

804 JLM of seedling traits from individual (A) normal (NP) and (B) early planting (EP) field trials.

805 Field location and year were included as prefixes for each seedling trait. Five NP traits that failed

806 to detect QTL were excluded from the figure but used for calculating NP seedling trait BLUPs.

807 JLM with seedling trait BLUPs, generated with ~75,000 data points from ~16,000 field plots,

808 from (C) normal and (D) early planting. Additionally, (E) JLM of plant height, flowering time,

809 and grain tannins were included. Classical dwarfing and tannin genes were noted with gray

810 dashed lines. Chilling tolerance QTL detected under early planting are noted with blue dashed

811 lines and green lines noted chilling tolerance QTL detected under both early and normal

812 planting. The QTL under normal planting were noted with red dashed lines. Positive or negative

813 effects of the BTx623 allele was indicated in orange or blue colors, respectively. The percentage

814 of variation explained is proportional to the width of the box for each locus and loci explaining

815 phenotypic variation >10% are noted with circles. Abbreviations: EC, emergence count. SV1–3,

816 seedling vigor1–3.

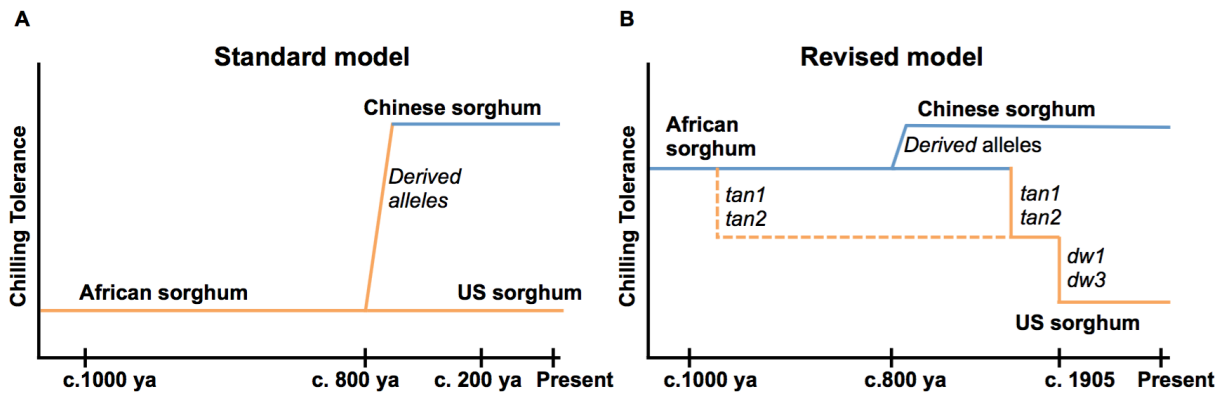

817  
818  
819  
820  
821  
822  
823  
824  
825  
826  
827  
828

#### Figure 4. Evolutionary origin and agronomic effects of chilling tolerance

(A) Standard model: African sorghums are chilling sensitive based on their tropical origin, sorghum dispersed into northern China (c. 800 years ago) has adapted to chilling while the US sorghums derived from African sorghums remain chilling-sensitive. (B) Based on the genetic architecture of early-season chilling tolerance, we revised the model to explain chilling sensitivity of US sorghums. Coinheritance of chilling tolerance loci with wildtype alleles of classical dwarfing (*Dw1* and *Dw3*) and tannin (*Tan1* and *Tan2*) genes suggest tropical-origin sorghums are chilling-tolerant. Inadvertent selection of chilling-sensitive alleles with favorable dwarfing (*dw1* and *dw3*) and nontannin (*tan1* and *tan2*) alleles resulted in persistence of chilling sensitivity in US sorghums, despite breeding for chilling tolerance over the past 50 years.

829 **Table 1 Broad-sense heritability ( $H^2$ ) of early- and normal-planted field traits.**

| <b>Seedling traits</b>   | <b><math>H^2</math> early planting<sup>a</sup></b> | <b><math>H^2</math> normal planting<sup>b</sup></b> |
|--------------------------|----------------------------------------------------|-----------------------------------------------------|
| Emergence count (EC)     | 0.45                                               | 0.53                                                |
| Seedling vigor1 (SV1)    | 0.52                                               | 0.57                                                |
| Seedling vigor2 (SV2)    | 0.39                                               | 0.78                                                |
| Seedling vigor3 (SV3)    | 0.37                                               | 0.53                                                |
| Damage rating (DR)       | 0.35                                               | -                                                   |
| Seedling height          | 0.03                                               | -                                                   |
| Plant height at maturity | 0.93                                               | -                                                   |

830

831 <sup>a</sup> Field phenotypes from six early-planted trials.

832 <sup>b</sup> Field phenotypes from two normal-planted trials.

833

834

835

836

837 **Table 2 Joint linkage mapping (JLM) with early-planted field phenotypes.**

| Trait <sup>a</sup> | QTL                  | QTL_SNP     | PVE <sup>b</sup> | Additive effect <sup>c</sup> | Known loci <sup>d</sup> | Distance to known loci | QTL name <sup>e</sup> |
|--------------------|----------------------|-------------|------------------|------------------------------|-------------------------|------------------------|-----------------------|
| EPEC               | <i>qSbEPEC_4-62</i>  | S4_62368531 | 9.2              | -0.08                        | <i>Tan1</i>             | 53 kb                  | <i>qSbCT04.62</i>     |
|                    | <i>qSbEPEC_3-72</i>  | S3_72791601 | 2.4              | 0.01                         |                         |                        |                       |
|                    | <i>qSbEPEC_2-08</i>  | S2_8672301  | 2.8              | -0.06                        | <i>Tan2</i>             | 0.6 Mb                 | <i>qSbCT02.08</i>     |
|                    | <i>qSbEPEC_7-59</i>  | S7_59915577 | 3.3              | -0.08                        | <i>Dw3</i>              | 93 kb                  | <i>qSbCT07.59</i>     |
|                    | <i>qSbEPEC_9-58</i>  | S9_58070153 | 1.5              | -0.04                        | <i>Dw1</i>              | 1 Mb                   | <i>qSbCT09.57</i>     |
|                    | <i>qSbEPEC_3-01</i>  | S3_1779472  | 1.4              | 0.03                         |                         |                        |                       |
| EPSV1              | <i>qSbEPSV1_4-62</i> | S4_62368531 | 5.4              | -0.07                        | <i>Tan1</i>             | 53 kb                  | <i>qSbCT04.62</i>     |
|                    | <i>qSbEPSV1_9-55</i> | S9_55625332 | 5                | -0.07                        | <i>Dw1</i>              | 1.4 Mb                 | <i>qSbCT09.57</i>     |
|                    | <i>qSbEPSV1_1-57</i> | S1_57941435 | 5.7              | -0.11                        |                         |                        | <i>qSbCT01.57</i>     |
|                    | <i>qSbEPSV1_1-05</i> | S1_5730743  | 3.9              | -0.06                        |                         |                        | <i>qSbCT01.06</i>     |
|                    | <i>qSbEPSV1_7-12</i> | S7_12580350 | 4.5              | -0.06                        |                         |                        | <i>qSbCT07.10</i>     |
|                    | <i>qSbEPSV1_2-09</i> | S2_9260382  | 3.9              | -0.06                        | <i>Tan2</i>             | 1.2 Mb                 | <i>qSbCT02.08</i>     |
|                    | <i>qSbEPSV1_3-01</i> | S3_1447612  | 1.4              | 0.03                         |                         |                        |                       |
|                    | <i>qSbEPSV1_5-04</i> | S5_4403613  | 1.6              | -0.04                        |                         |                        | <i>qSbCT05.04</i>     |
|                    | <i>qSbEPSV1_1-13</i> | S1_13526795 | 3.5              | -0.1                         |                         |                        | <i>qSbCT01.13</i>     |
|                    | <i>qSbEPSV1_7-59</i> | S7_59290017 | 5.6              | -0.08                        | <i>Dw3</i>              | 0.5 Mb                 | <i>qSbCT07.59</i>     |
| EPSV2              | <i>qSbEPSV2_4-62</i> | S4_62455479 | 5.8              | -0.05                        | <i>Tan1</i>             | 0.1 Mb                 | <i>qSbCT04.62</i>     |
|                    | <i>qSbEPSV2_2-09</i> | S2_9218398  | 6                | -0.05                        | <i>Tan2</i>             | 1.2 Mb                 | <i>qSbCT02.08</i>     |
|                    | <i>qSbEPSV2_5-04</i> | S5_4284787  | 3.6              | -0.04                        |                         |                        | <i>qSbCT05.04</i>     |
|                    | <i>qSbEPSV2_1-13</i> | S1_13188261 | 4.6              | -0.06                        |                         |                        | <i>qSbCT01.13</i>     |
|                    | <i>qSbEPSV2_1-06</i> | S1_6902771  | 4.8              | -0.05                        |                         |                        | <i>qSbCT01.06</i>     |
|                    | <i>qSbEPSV2_7-08</i> | S7_8916696  | 2.1              | -0.05                        |                         |                        | <i>qSbCT07.10</i>     |
| EPSV3              | <i>qSbEPSV3_2-09</i> | S2_9218398  | 6.8              | -0.05                        | <i>Tan2</i>             | 1.2 Mb                 | <i>qSbCT02.08</i>     |
|                    | <i>qSbEPSV3_4-62</i> | S4_62455479 | 5.2              | -0.05                        | <i>Tan1</i>             | 0.1 Mb                 | <i>qSbCT04.62</i>     |
|                    | <i>qSbEPSV3_1-09</i> | S1_9756192  | 5.2              | -0.06                        |                         |                        | <i>qSbCT01.13</i>     |
|                    | <i>qSbEPSV3_1-26</i> | S1_26930469 | 4.3              | -0.05                        |                         |                        |                       |
|                    | <i>qSbEPSV3_5-04</i> | S5_4284787  | 3.5              | -0.03                        |                         |                        | <i>qSbCT05.04</i>     |

838

839 <sup>a</sup> Early-planted emergence count (EPEC) and seedling vigor (EPSV1–3) BLUPS were used for JLM.

840 <sup>b</sup> Percentage of variation explained (PVE).

841 <sup>c</sup> Positive or negative effects of the BTx623 allele.

842 <sup>d</sup> Previously characterized genes colocalizing with the mapped QTL.

843 <sup>e</sup> QTL in 2 Mb interval, detected with different seedling traits, were assigned a common name.

844

845

846 **Table 3 Joint linkage mapping of plant height, flowering time, and grain tannins.**

| Trait <sup>a</sup> | QTL                 | QTL_SNP      | PVE <sup>b</sup> | Additive effect <sup>c</sup> | Known loci <sup>d</sup> | Distance to known loci |
|--------------------|---------------------|--------------|------------------|------------------------------|-------------------------|------------------------|
| PHT                | <i>qSbPHT_7-59</i>  | S7_59675001  | 32               | -21                          | <i>Dw3</i>              | 0.1 Mb                 |
|                    | <i>qSbPHT_9-57</i>  | S9_57051085  | 20               | -17                          | <i>Dw1</i>              | 12 kb                  |
|                    | <i>qSbPHT_1-67</i>  | S1_67896587  | 0.5              | 0.7                          |                         |                        |
|                    | <i>qSbPHT_2-47</i>  | S2_47294140  | 2                | -5                           |                         |                        |
|                    | <i>qSbPHT_7-59</i>  | S7_59956049  | 33               | -21                          | <i>Dw3</i>              | 0.1 Mb                 |
|                    | <i>qSbPHT_1-63</i>  | S1_63253487  | 1                | 7                            |                         |                        |
| FT                 | <i>qSbFT_9-58</i>   | S9_58468998  | 8                | -1.5                         | <i>CN8</i>              | 3.5 Mb                 |
|                    | <i>qSbFT_2-64</i>   | S2_63261883  | 6                | 1.4                          |                         |                        |
|                    | <i>qSbFT_8-59</i>   | S8_59740114  | 2                | 0.9                          |                         |                        |
|                    | <i>qSbFT_1-56</i>   | S1_56436041  | 3                | -1                           |                         |                        |
|                    | <i>qSbFT_3-01</i>   | S3_1441099   | 3.03             | -0.96                        |                         |                        |
|                    | <i>qSbFT_4-63</i>   | S4_63556402  | 2.01             | 0.82                         |                         |                        |
|                    | <i>qSbFT_4-54</i>   | S4_54231126  | 3.11             | -1.32                        | <i>CN2</i>              | 8.6 Mb                 |
|                    | <i>qSbFT_1-14</i>   | S1_14862315  | 1.97             | 0.92                         |                         |                        |
|                    | <i>qSbFT_10-56</i>  | S10_56045853 | 0.69             | -0.4                         |                         |                        |
|                    | <i>qSbFT_6-40</i>   | S6_40299229  | 2.55             | -0.89                        | <i>Ma1</i>              | 5 kb                   |
| Tannin             | <i>qSbTan_4-62</i>  | S4_62389178  | 72               | -0.4                         | <i>Tan1</i>             | 73 kb                  |
|                    | <i>qSbTan_4-62</i>  | S4_62261292  | 46               | -0.4                         | <i>Tan1</i>             | 54 kb                  |
|                    | <i>qSbTan_4-61</i>  | S4_61963287  | 22               | -0.3                         | <i>Tan1</i>             | 0.3 Mb                 |
|                    | <i>qSbTan_2-09</i>  | S2_9390193   | 0.06             | 0.02                         | <i>Tan2</i>             | 1.4 Mb                 |
|                    | <i>qSbTan_10-59</i> | S10_59593345 | 2                | 0.2                          |                         |                        |

847

848 <sup>a</sup> Plant height (PHT), flowering time (FT), and grain tannin phenotypes were used for JLM.

849 <sup>b</sup> Percentage of variation explained (PVE).

850 <sup>c</sup> Positive or negative effects of the BTx623 allele.

851 <sup>d</sup> Previously characterized PHT, FT, and grain tannin genes colocalizing with the mapped QTL.
